# Supplementary material for: Exposure of Reproductive-Aged Women to Multiple Metals and Its Associations with Unexplained Recurrent Miscarriage
Source: MDPI journal article supplement (doi:10.3390/toxics11100830), 2023-09-30
Supplement: s1 [file s1]

## **Supplemental Materials**

### **Exposures of reproductive-aged women to multiple metals and associations with unexplained recurrent miscarriage**

Yingying Zhang, Xi Yan, Jianhua Tan, Jifan Tan, Chunsheng Liu, Pan Yang, Yanping Xian, Qiong Wang

Supplementary Table S1. Equation, R2, range, level of detection (LOD) and geometric of 22 elements.

| Elements  | Equation                    | R <sup>2</sup> | Range   | LOD    | % < LOD | Geometric Mean (Q1-Q3)     |
|-----------|-----------------------------|----------------|---------|--------|---------|----------------------------|
| Be (µg/L) | Y=7.6790E-004*x+2.2534E-005 | 1              | 0.1-100 | 0.023  | 83.64   | 0.13 (0.02-0.02)           |
| Na (mg/L) | Y=17.5553*x+1.0366          | 1              | 0.1-5.0 | 0.034  | 0.00    | 3049.39 (2872.62-3203.76)  |
| Mg (mg/L) | Y=8.8780*x+0.0184           | 1              | 0.1-5.0 | 0.0038 | 0.00    | 20.40 (18.31-22.82)        |
| K (mg/L)  | Y=3.8858*x+0.2350           | 0.9999         | 0.1-5.0 | 0.015  | 0.00    | 191.93 (148.10-194.77)     |
| Ca (mg/L) | Y=0.2217*x+0.0046           | 0.9998         | 0.1-5.0 | 0.042  | 0.00    | 94.37 (85.47-104.70)       |
| Ti (µg/L) | Y=3.7724E-004*x+1.0540E-004 | 0.9999         | 0.5-100 | 0.55   | 73.45   | 6.96 (0.39-3.18)           |
| V (µg/L)  | Y=0.1448*x+0.0013           | 1              | 0.1-100 | 0.015  | 14.55   | 0.26 (0.11-0.30)           |
| Cr (µg/L) | Y=0.1910*x+0.0114           | 1              | 0.1-100 | 0.078  | 16.73   | 4.08 (0.63-4.48)           |
| Mn (µg/L) | Y=0.0956*x+0.0043           | 0.9999         | 0.1-100 | 0.057  | 18.91   | 4.02 (0.70-4.06)           |
| Fe (µg/L) | Y=0.1606*x+0.1456           | 1              | 10-500  | 1.88   | 0.00    | 1289.47 (951.10-1537.47)   |
| Co (µg/L) | Y=0.2800*x+0.0038           | 0.9999         | 0.1-100 | 0.017  | 1.09    | 0.80 (0.30-0.72)           |
| Ni (µg/L) | Y=0.0103*x+0.0033           | 0.9993         | 0.5-100 | 0.17   | 18.55   | 18.98 (1.59-24.87)         |
| Cu (µg/L) | Y=0.0299*x+0.0309           | 0.9997         | 0.5-100 | 1.1    | 0.00    | 9983.43 (8187.41-11063.98) |
| Zn (µg/L) | Y=0.0244*x+0.0569           | 0.9999         | 0.5-100 | 1.34   | 0.00    | 974.25 (803.15-1117.72)    |
| Se (µg/L) | Y=0.0016*x+4.2796E-004      | 0.9995         | 0.5-100 | 1.08   | 0.36    | 118.86 (98.84-140.28)      |
| Mo (µg/L) | Y=0.1298*x+0.0020           | 1              | 0.1-100 | 0.032  | 0.36    | 1.22 (0.86-1.45)           |
| Ag (µg/L) | Y=0.5571*x+0.0013           | 1              | 0.1-100 | 0.007  | 20.36   | 0.11 (0.02-0.12)           |
| Cd (µg/L) | Y=0.0699*x+5.9152E-005      | 1              | 0.1-100 | 0.008  | 50.91   | 0.10 (0.01-0.06)           |
| Sb (µg/L) | Y=0.3580*x+0.0020           | 1              | 0.1-100 | 0.004  | 0.36    | 2.55 (2.04-2.92)           |
| Ba (µg/L) | Y=0.1057*x+0.0103           | 0.9998         | 0.5-100 | 0.035  | 34.18   | 3.51 (0.02-4.18)           |
| Tl (µg/L) | Y=2.3409*x+8.7091E-004      | 1              | 0.1-100 | 0.004  | 37.09   | 0.07 (0.00-0.04)           |
| Pb (µg/L) | Y=1.5111*x+0.0997           | 1              | 0.1-100 | 0.008  | 42.91   | 1.15 (0.01-1.15)           |

Abbreviations: LOD, limit of detection; Be, beryllium; Na, sodium; Mg, magnesium; K, potassium; Ca, calcium; Ti, titanium; V, vanadium; Cr, chromium; Mn, manganese; Fe, iron; Co, cobalt; Ni, nickel; Cu, copper; Zn, zinc; Se, selenium; Mo, molybdenum; Ag, silver; Cd, cadmium; Sb, antimony; Ba, barium; Tl, thallium; Pb, lead.

Supplementary Table S2. Spearman correlations among serum concentrations of 19 elements in control group and uRM group.

| group   |    | Na          | Mg          | K           | Ca          | V           | Cr          | Mn          | Fe          | Co          | Ni          | Cu          | Zn          | Se          | Mo          | Ag          | Sb          | Ba          | Tl          | Pb          |
|---------|----|-------------|-------------|-------------|-------------|-------------|-------------|-------------|-------------|-------------|-------------|-------------|-------------|-------------|-------------|-------------|-------------|-------------|-------------|-------------|
| control | Na | 1.000       | 0.368<br>*  | 0.138       | 0.282       | 0.268       | 0.157       | 0.325<br>*  | 0.061       | 0.193       | 0.100       | 0.343<br>*  | 0.134       | 0.202       | 0.262       | 0.483<br>** | 0.174       | -0.282      | -0.038      | -0.191      |
| uRM     |    | 1.000       | 0.123       | -0.021      | 0.064       | 0.221<br>** | 0.207<br>** | 0.222<br>** | 0.141<br>*  | -0.123      | 0.175<br>** | 0.413<br>** | -0.040      | 0.212<br>** | 0.250<br>** | 0.190<br>** | 0.174<br>** | 0.308<br>** | 0.120       | 0.257<br>** |
| control | Mg | 0.368<br>*  | 1.000       | 0.466<br>** | 0.590<br>** | 0.168       | -0.074      | -0.122      | 0.221       | 0.269       | 0.042       | 0.331<br>*  | 0.338<br>*  | 0.389<br>** | 0.109       | 0.191       | 0.185       | 0.043       | 0.202       | -0.005      |
| uRM     |    | 0.123       | 1.000       | 0.667<br>** | 0.767<br>** | 0.102       | 0.128       | 0.115       | 0.280<br>** | 0.215<br>** | 0.373<br>** | 0.170<br>** | 0.422<br>** | 0.320<br>** | 0.148<br>*  | -0.059      | 0.266<br>** | 0.276<br>** | 0.086       | 0.186<br>** |
| control | K  | 0.138       | 0.466<br>** | 1.000       | 0.631<br>** | 0.099       | -0.144      | -0.015      | 0.344<br>*  | 0.232       | -0.138      | 0.319<br>*  | 0.496<br>** | 0.582<br>** | 0.151       | 0.077       | 0.213       | 0.132       | 0.469<br>** | -0.053      |
| uRM     |    | -0.021      | 0.667<br>** | 1.000       | 0.550<br>** | 0.043       | 0.098       | 0.037       | 0.456<br>** | 0.098       | 0.167<br>*  | 0.119       | 0.493<br>** | 0.264<br>** | 0.081       | -0.116      | 0.107       | 0.197<br>** | 0.061       | 0.040       |
| control | Ca | 0.282       | 0.590<br>** | 0.631<br>** | 1.000       | 0.009       | -0.021      | -0.245      | 0.157       | 0.341<br>*  | 0.149       | 0.088       | 0.338<br>*  | 0.522<br>** | 0.447<br>** | 0.093       | 0.365<br>*  | 0.182       | 0.325<br>*  | -0.113      |
| uRM     |    | 0.064       | 0.767<br>** | 0.550<br>** | 1.000       | 0.149<br>*  | 0.159<br>*  | 0.188<br>** | 0.172<br>** | 0.222<br>** | 0.468<br>** | 0.182<br>** | 0.398<br>** | 0.493<br>** | 0.176<br>** | 0.038       | 0.278<br>** | 0.341<br>** | -0.017      | 0.176<br>** |
| control | V  | 0.268       | 0.168       | 0.099       | 0.009       | 1.000       | 0.377<br>*  | 0.604<br>** | 0.082       | 0.024       | -0.010      | 0.078       | 0.287       | 0.086       | -0.035      | 0.250       | 0.035       | 0.022       | 0.312<br>*  | 0.214       |
| uRM     |    | 0.221<br>** | 0.102       | 0.043       | 0.149<br>*  | 1.000       | 0.588<br>** | 0.758<br>** | 0.009       | 0.234<br>** | 0.242<br>** | 0.140<br>*  | 0.228<br>** | 0.430<br>** | 0.347<br>** | 0.579<br>** | 0.302<br>** | 0.027       | 0.283<br>** | 0.155<br>*  |
| control | Cr | 0.157       | -0.074      | -0.144      | -0.021      | 0.377<br>*  | 1.000       | 0.226       | -0.042      | 0.079       | 0.026       | 0.370<br>*  | -0.048      | 0.138       | 0.044       | 0.223       | -0.074      | 0.173       | -0.211      | 0.003       |
| uRM     |    | 0.207<br>** | 0.128       | 0.098       | 0.159<br>*  | 0.588<br>** | 1.000       | 0.729<br>** | 0.092       | 0.338<br>** | 0.308<br>** | 0.149<br>*  | 0.159<br>*  | 0.255<br>** | 0.193<br>** | 0.189<br>** | 0.077       | 0.154<br>*  | -0.035      | 0.213<br>** |
| control | Mn | 0.325<br>*  | -0.122      | -0.015      | -0.245      | 0.604<br>** | 0.226       | 1.000       | 0.090       | 0.229       | 0.126       | 0.120       | 0.213       | -0.055      | -0.064      | 0.291       | -0.015      | 0.080       | 0.192       | 0.329<br>*  |
| uRM     |    | 0.222<br>** | 0.115       | 0.037       | 0.188<br>** | 0.758<br>** | 0.729<br>** | 1.000       | 0.079       | 0.284<br>** | 0.306<br>** | 0.218<br>** | 0.212<br>** | 0.395<br>** | 0.265<br>** | 0.369<br>** | 0.270<br>** | 0.034       | 0.197<br>** | 0.195<br>** |
| control | Fe | 0.061       | 0.221       | 0.344<br>*  | 0.157       | 0.082       | -0.042      | 0.090       | 1.000       | -0.145      | 0.195       | 0.275       | 0.073       | 0.287       | -0.035      | 0.067       | -0.228      | 0.041       | 0.348<br>*  | -0.134      |
| uRM     |    | 0.141<br>*  | 0.280<br>** | 0.456<br>** | 0.172<br>** | 0.009       | 0.092       | 0.079       | 1.000       | 0.028       | -0.037      | 0.092       | 0.349<br>** | 0.137<br>*  | -0.069      | -0.056      | 0.082       | 0.011       | -0.009      | -0.076      |

|         |    |                  |             |             |             |             |                 |             |             |             |                 |                 |             |             |             |             |             |                  |             |                  |
|---------|----|------------------|-------------|-------------|-------------|-------------|-----------------|-------------|-------------|-------------|-----------------|-----------------|-------------|-------------|-------------|-------------|-------------|------------------|-------------|------------------|
| control | Co | 0.193            | 0.269       | 0.232       | 0.341<br>*  | 0.024       | 0.079           | 0.229       | -0.145      | 1.000       | 0.065           | -0.111          | 0.151       | 0.299       | -0.047      | 0.168       | 0.513<br>** | 0.055            | 0.229       | -0.033           |
| uRM     |    | -0.123           | 0.215<br>** | 0.098       | 0.222<br>** | 0.234<br>** | 0.338<br>**     | 0.284<br>** | 0.028       | 1.000       | 0.414<br>**     | -0.074          | 0.230<br>** | 0.124       | 0.075       | 0.058       | 0.069       | 0.303<br>**      | 0.074       | 0.434<br>**      |
| control | Ni | 0.100            | 0.042       | -0.138      | 0.149       | -0.010      | 0.026           | 0.126       | 0.195       | 0.065       | 1.000           | 0.045           | -0.036      | -0.144      | 0.259       | -0.063      | -0.088      | 0.114            | 0.099       | 0.085            |
| uRM     |    | -<br>0.175<br>** | 0.373<br>** | 0.167<br>*  | 0.468<br>** | 0.242<br>** | 0.308<br>**     | 0.306<br>** | -0.037      | 0.414<br>** | 1.000           | -<br>0.144<br>* | 0.366<br>** | 0.100       | 0.087       | 0.109       | 0.115       | 0.537<br>**      | -0.112      | 0.515<br>**      |
| control | Cu | 0.343<br>*       | 0.331<br>*  | 0.319<br>*  | 0.088       | 0.078       | -<br>0.370<br>* | 0.120       | 0.275       | -0.111      | 0.045           | 1.000           | 0.236       | -0.017      | -0.027      | 0.138       | 0.027       | -0.074           | 0.125       | 0.106            |
| uRM     |    | 0.413<br>**      | 0.170<br>** | 0.119       | 0.182<br>** | 0.140<br>*  | 0.149<br>*      | 0.218<br>** | 0.092       | -0.074      | -<br>0.144<br>* | 1.000           | 0.021       | 0.246<br>** | 0.111       | 0.052       | 0.130<br>*  | -<br>0.230<br>** | 0.082       | -<br>0.190<br>** |
| control | Zn | 0.134            | 0.338<br>*  | 0.496<br>** | 0.338<br>*  | 0.287       | -0.048          | 0.213       | 0.073       | 0.151       | -0.036          | 0.236           | 1.000       | 0.217       | 0.052       | -0.112      | 0.031       | 0.307<br>*       | 0.195       | 0.235            |
| uRM     |    | -0.040           | 0.422<br>** | 0.493<br>** | 0.398<br>** | 0.228<br>** | 0.159<br>*      | 0.212<br>** | 0.349<br>** | 0.230<br>** | 0.366<br>**     | 0.021           | 1.000       | 0.226<br>** | 0.001       | 0.048       | 0.254<br>** | 0.409<br>**      | 0.130<br>*  | 0.341<br>**      |
| control | Se | 0.202            | 0.389<br>** | 0.582<br>** | 0.522<br>** | 0.086       | 0.138           | -0.055      | 0.287       | 0.299       | -0.144          | -0.017          | 0.217       | 1.000       | 0.076       | 0.412<br>** | 0.396<br>** | -0.099           | 0.368<br>*  | -0.254           |
| uRM     |    | 0.212<br>**      | 0.320<br>** | 0.264<br>** | 0.493<br>** | 0.430<br>** | 0.255<br>**     | 0.395<br>** | 0.137<br>*  | 0.124       | 0.100           | 0.246<br>**     | 0.226<br>** | 1.000       | 0.171<br>** | 0.430<br>** | 0.423<br>** | -0.099           | 0.324<br>** | -<br>0.133<br>*  |
| control | Mo | 0.262            | 0.109       | 0.151       | 0.447<br>** | -0.035      | 0.044           | -0.064      | -0.035      | -0.047      | 0.259           | -0.027          | 0.052       | 0.076       | 1.000       | 0.191       | 0.099       | -0.040           | -0.014      | 0.064            |
| uRM     |    | 0.250<br>**      | 0.148<br>*  | 0.081       | 0.176<br>** | 0.347<br>** | 0.193<br>**     | 0.265<br>** | -0.069      | 0.075       | 0.087           | 0.111           | 0.001       | 0.171<br>** | 1.000       | 0.250<br>** | 0.114       | 0.047            | 0.145<br>*  | 0.002            |
| control | Ag | 0.483<br>**      | 0.191       | 0.077       | 0.093       | 0.250       | 0.223           | 0.291       | 0.067       | 0.168       | -0.063          | 0.138           | -0.112      | 0.412<br>** | 0.191       | 1.000       | 0.265       | -0.143           | 0.006       | 0.047            |
| uRM     |    | 0.190<br>**      | -0.059      | -0.116      | 0.038       | 0.579<br>** | 0.189<br>**     | 0.369<br>** | -0.056      | 0.058       | 0.109           | 0.052           | 0.048       | 0.430<br>** | 0.250<br>** | 1.000       | 0.279<br>** | -0.082           | 0.354<br>** | 0.058            |
| control | Sb | 0.174            | 0.185       | 0.213       | 0.365<br>*  | 0.035       | -0.074          | -0.015      | -0.228      | 0.513<br>** | -0.088          | 0.027           | 0.031       | 0.396<br>** | 0.099       | 0.265       | 1.000       | -0.148           | 0.438<br>** | -0.027           |
| uRM     |    | 0.174<br>**      | 0.266<br>** | 0.107       | 0.278<br>** | 0.302<br>** | 0.077           | 0.270<br>** | 0.082       | 0.069       | 0.115           | 0.130<br>*      | 0.254<br>** | 0.423<br>** | 0.114       | 0.279<br>** | 1.000       | -0.057           | 0.396<br>** | -0.056           |
| control | Ba | -0.282           | 0.043       | 0.132       | 0.182       | 0.022       | 0.173           | 0.080       | 0.041       | 0.055       | 0.114           | -0.074          | 0.307<br>*  | -0.099      | -0.040      | -0.143      | -0.148      | 1.000            | -0.223      | 0.386<br>*       |

|         |    |                  |             |             |             |             |             |             |            |             |             |                  |             |                 |            |             |             |                  |                  |             |
|---------|----|------------------|-------------|-------------|-------------|-------------|-------------|-------------|------------|-------------|-------------|------------------|-------------|-----------------|------------|-------------|-------------|------------------|------------------|-------------|
| uRM     |    | -<br>0.308<br>** | 0.276<br>** | 0.197<br>** | 0.341<br>** | 0.027       | 0.154<br>*  | 0.034       | 0.011      | 0.303<br>** | 0.537<br>** | -<br>0.230<br>** | 0.409<br>** | -0.099          | 0.047      | -0.082      | -0.057      | 1.000            | -<br>0.242<br>** | 0.550<br>** |
| control | Tl | -0.038           | 0.202       | 0.469<br>** | 0.325<br>*  | 0.312<br>*  | -0.211      | 0.192       | 0.348<br>* | 0.229       | 0.099       | 0.125            | 0.195       | 0.368<br>*      | -0.014     | 0.006       | 0.438<br>** | -0.223           | 1.000            | 0.033       |
| uRM     |    | 0.120            | 0.086       | 0.061       | -0.017      | 0.283<br>** | -0.035      | 0.197<br>** | -0.009     | 0.074       | -0.112      | 0.082            | 0.130<br>*  | 0.324<br>**     | 0.145<br>* | 0.354<br>** | 0.396<br>** | -<br>0.242<br>** | 1.000            | -0.023      |
| control | Pb | -0.191           | -0.005      | -0.053      | -0.113      | 0.214       | 0.003       | 0.329<br>*  | -0.134     | -0.033      | 0.085       | 0.106            | 0.235       | -0.254          | 0.064      | 0.047       | -0.027      | 0.386<br>*       | 0.033            | 1.000       |
| uRM     |    | -<br>0.257<br>** | 0.186<br>** | 0.040       | 0.176<br>** | 0.155<br>*  | 0.213<br>** | 0.195<br>** | -0.076     | 0.434<br>** | 0.515<br>** | -<br>0.190<br>** | 0.341<br>** | -<br>0.133<br>* | 0.002      | 0.058       | -0.056      | 0.550<br>**      | -0.023           | 1.000       |

Abbreviation: Be, beryllium; Na, sodium; Mg, magnesium; K, potassium; Ca, calcium; Ti, titanium; V, vanadium; Cr, chromium; Mn, manganese; Fe, iron; Co, cobalt; Ni, nickel; Cu, copper; Zn, zinc; Se, selenium; Mo, molybdenum; Ag, silver; Cd, cadmium; Sb, antimony; Ba, barium; Tl, thallium; Pb, lead.  
Note: correlations among different metals were conducted by Spearman analysis. \*Correlation is significant at the 00.05 level (2-tailed); \*\*Correlation is significant at the 00.01 level (2-tailed)

Supplementary Table S3. The association of uRM with the WQS index of metals.

| Model    | Direction | index           | Estimate | Std. Error | z value | <i>P</i> |
|----------|-----------|-----------------|----------|------------|---------|----------|
| Crude    | Positive  | WQS             | 1.300    | 0.611      | 2.120   | 0.034    |
|          | Negative  | WQS             | -1.420   | 0.445      | -3.200  | 0.001    |
| Adjusted | Positive  | WQS             | 1.560    | 0.655      | 2.380   | 0.017    |
|          |           | age             | 0.076    | 0.058      | 1.310   | 0.189    |
|          |           | BMI             | -0.082   | 0.095      | -0.861  | 0.389    |
|          |           | Education level | -0.464   | 0.349      | -1.330  | 0.183    |
|          | Negative  | WQS             | -1.460   | 0.468      | -3.120  | 0.002    |
|          |           | age             | 0.067    | 0.058      | 1.160   | 0.247    |
|          |           | BMI             | -0.050   | 0.098      | -0.519  | 0.604    |
|          |           | Education level | -0.576   | 0.350      | -1.640  | 0.101    |

Supplementary Table S4. Association between metal composite levels and uRM based on weighted quantile sum (WQS) regression analysis.

|    | WQS index | mean_weight | mean_weight (adjusted*) |
|----|-----------|-------------|-------------------------|
| Mg | Positive  | 0.000       | 0.000                   |
|    | Negative  | 0.054       | 0.048                   |
| Ca | Positive  | 0.000       | 0.000                   |
|    | Negative  | 0.499       | 0.391                   |
| V  | Positive  | 0.025       | 0.060                   |
|    | Negative  | 0.015       | 0.005                   |
| Cr | Positive  | 0.020       | 0.011                   |
|    | Negative  | 0.019       | 0.023                   |
| Mn | Positive  | 0.008       | 0.004                   |
|    | Negative  | 0.009       | 0.016                   |
| Fe | Positive  | 0.087       | 0.065                   |
|    | Negative  | 0.013       | 0.008                   |
| Co | Positive  | 0.006       | 0.011                   |
|    | Negative  | 0.015       | 0.028                   |
| Ni | Positive  | 0.267       | 0.240                   |
|    | Negative  | 0.000       | 0.000                   |
| Cu | Positive  | 0.012       | 0.004                   |
|    | Negative  | 0.056       | 0.031                   |
| Zn | Positive  | 0.054       | 0.091                   |
|    | Negative  | 0.000       | 0.000                   |
| Se | Positive  | 0.000       | 0.000                   |
|    | Negative  | 0.144       | 0.233                   |
| Mo | Positive  | 0.028       | 0.015                   |
|    | Negative  | 0.043       | 0.033                   |
| Ag | Positive  | 0.035       | 0.015                   |
|    | Negative  | 0.032       | 0.084                   |
| Sb | Positive  | 0.071       | 0.028                   |
|    | Negative  | 0.000       | 0.001                   |
| Ba | Positive  | 0.052       | 0.070                   |
|    | Negative  | 0.006       | 0.004                   |
| Tl | Positive  | 0.031       | 0.041                   |
|    | Negative  | 0.095       | 0.094                   |
| Pb | Positive  | 0.304       | 0.345                   |
|    | Negative  | 0.000       | 0.000                   |

Abbreviation: Mg, magnesium; Ca, calcium; V, vanadium; Cr, chromium; Mn, manganese; Fe, iron; Co, cobalt; Ni, nickel; Cu, copper; Zn, zinc; Se, selenium; Mo, molybdenum; Ag, silver; Sb, antimony; Ba, barium; Tl, thallium; Pb, lead. \*Adjusted by age BMI and education level.
